# Supplementary material for: Total synthesis of coleophomone DElectronic supplementary information (ESI) available: selected physical data for compound 18. See http://www.rsc.org/suppdata/cc/b2/b208236p/
Source: Royal Society of Chemistry journal article supplement (doi:10.1039/b208236p), 2002-10-10
Supplement: b208236p.doc [file b208236p.doc]

**Supplementary data**

Selected data for compound **18** that exists as a mixture of two tautomeric atropisomers (3:2). Yellow syrup; *R*f = 0.31 (silica gel, hexane:EtOAc, 2:1); IR (film): max = 2967 (m), 2922 (s), 1776 (w), 1732 (w), 1651 (s), 1614 (s), 1589 (m), 1484 (s), 1270 (s), 1079 (m), 728 (m) cm–1; 1H NMR (600 MHz, CDCl3):  = 8.47 (d, *J* = 7.7 Hz, 1 H minor), 8.07 (d, *J* = 7.7 Hz, 1 H major), 7.41 (t, *J* = 7.7 Hz, 1 H minor), 7.35 (t, *J* = 7.7 Hz, 1 H major), 7.04 (d, *J* = 7.7 Hz, 1 H minor), 7.02 (d, *J* = 7.7 Hz, 1 H major), 6.29 (s, 1 H minor), 6.27 (s, 1 H major), 5.61 (s, 2 H major), 5.58 (s, 2 H minor), 4.85 (br t, *J* = 6.6 Hz, 2 H major), 4.82 (br t, *J* = 6.6 Hz, 2 H minor), 3.90 (s, 3 H minor), 3.90 (s, 3 H major), 2.83 (m, 2 H minor and 2 H major), 2.32 (dd, *J1* = 14.3 Hz, *J2* = 6.6 Hz, 2 H major), 2.24 (dd, *J1* = 14.3 Hz, *J2* = 6.6 Hz, 2 H minor), 1.97 (s, 3 H minor), 1.95 (s, 3 H major), 1.55 (s, 6 H minor), 1.49 (s, 6 H major); 13C NMR (150 MHz, CDCl3):  = 202.2 (minor), 200.3 (major), 186.7 (minor), 185.6 (major), 177.2 (major), 176.9 (minor), 157.3 (minor), 156.0 (major), 153.4 (2C), 134.3, 134.2, 134.1, 133.8, 131.1, 130.5, 130.1, 129.8, 121.5, 120.5, 118.9 (2C), 118.8 (2C), 114.7 (minor), 114.6 (major), 113.9 (minor), 113.8 (major), 75.8 (major), 75.5 (minor), 57.5 (minor), 56.9 (major), 55.5 (major and minor), 36.5 (2C minor), 36.3 (2C major), 25.7 (2C major and 2C minor), 19.5 (minor), 19.2 (major), 18.1 (major), 17.9 (minor); HRMS (MALDI) calcd for C26H30O4Na [MNa+ - H2O]: 429.2042; found: 429.2097; MS (ESI) 407 (MH+-H2O), 429 (MNa+ - H2O).
